# Supplementary material
Source: Springer Nature journal article supplement (http://www.springermedizin.de/resource/supplementary/12993_2011_402_MOESM1_ESM.pdf/9617688)

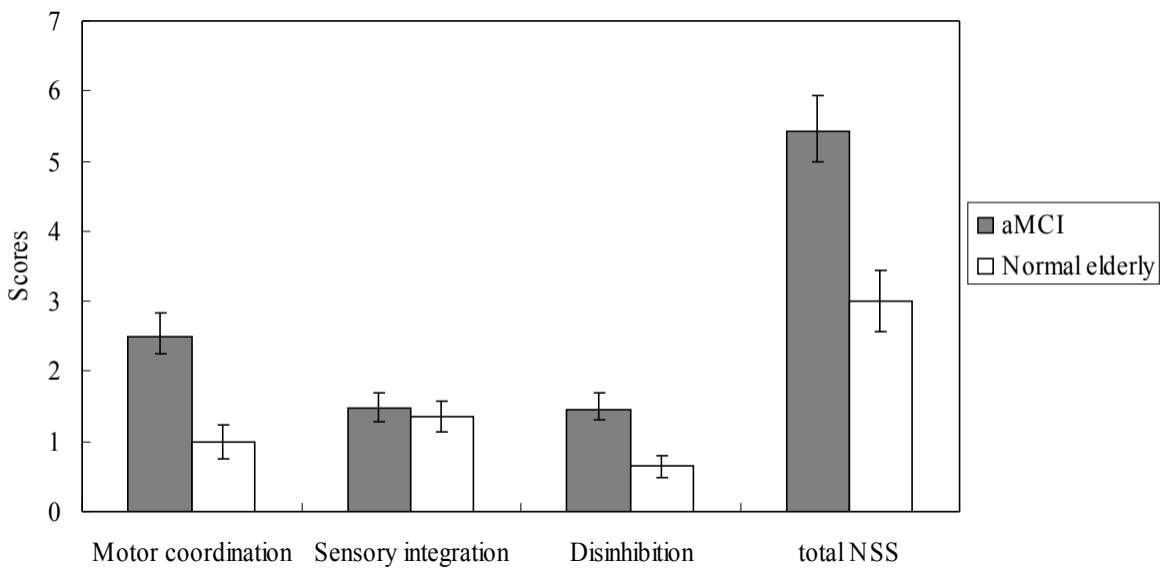

Supplement: MOESM1 [file 9617688]
